# Supplementary material for: Early Oral Ovalbumin Exposure during Maternal Milk Feeding Prevents Spontaneous Allergic Sensitization in Allergy-Prone Rat Pups
Source: Hindawi journal article supplement (doi:10.1155/2012/396232), 2011-12-04
Supplement: f1 [file 396232.f1.pdf]

**Supplemental Table 1:** Approximate composition of the Rat Milk Replacer

| Rat Milk Replacer     |        |
|-----------------------|--------|
| Metabolizable Energy  | 6500kJ |
| <u>g/L dry matter</u> |        |
| Solids                | 260    |
| Lipid                 | 119    |
| Protein               | 87     |
| Lactose               | 33     |
| Vitamins & Minerals   | 46.3   |
| β-Lactoglobulin       | 2.45   |
| Lipids                |        |
| C16:0                 | 20     |
| C18:0                 | 9      |
| C18:1(n-9)            | 54     |
| C18:2(n-6)            | 13     |
| C18:3(n-3)            | 6      |
| C20:4(n-6)            | 0.040  |
| C20:5(n-3)            | 0.068  |
| C22:6(n-3)            | 0.040  |
